# Supplementary material
Source: Springer Nature journal article supplement (https://www.springermedizin.de/resource/supplementary/13054_2012_702_MOESM4_ESM.pdf/9709070)
Supplement: MOESM4 [file 9709070]

# group2 versus group4

author

non-sepsis

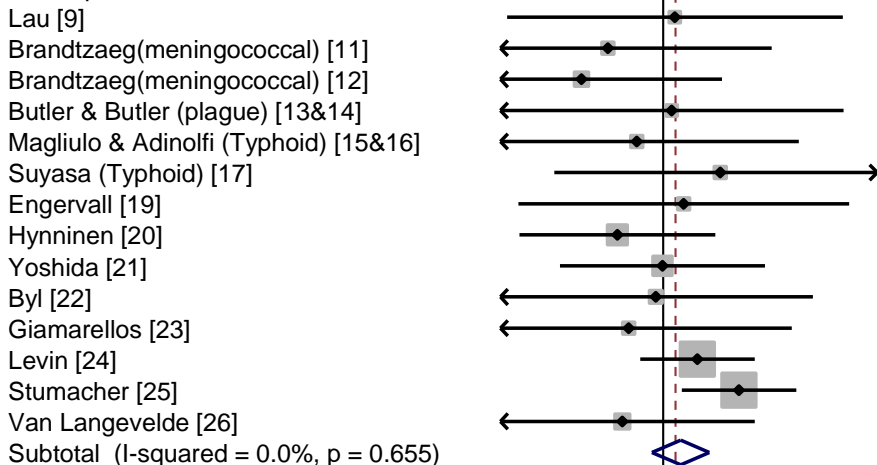

sepsis

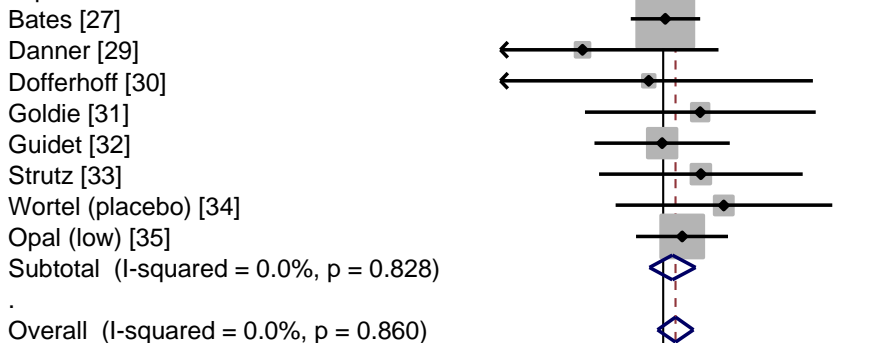

Overall (I-squared = 0.0%, p = 0.860)

.03 .1 .3 1 3 10 30 100

group 4 mortality higher <=> group 2 mortality higher
